# Supplementary material for: Disentangling Human-AI Hybrids
Source: Springer Nature journal article supplement (doi:10.1007/s12599-023-00810-1), 2023-05-12
Supplement: MOESM1 [file 25355938]

# **Disentangling Human-AI Hybrids – Conceptualizing the Interworking of Humans and AI-Enabled Systems**

**Lukas Fabri, Björn Häckel, Anna Maria Oberländer, Marius Rieg, Alexander Stohr**

Business & Information Systems Engineering (2023)

**Appendix (available online via <http://link.springer.com>)**

## **Appendix 1: Literature Review and Human-AI Hybrids Sample Compilation**

To capture both existing research and real-world applications of human-AI hybrids as the basis for developing our taxonomy, we base our research on a comprehensive review of both. We started this study by searching the existing literature on the collaboration of human agents and AI-enabled systems for relevant, high-quality articles following the guidelines of Webster and Watson (2002) and vom Brocke et al. (2015). In doing so, we applied a twofold search strategy to account for academic relevance and real-world applications.

We began by searching the scientific databases AIS electronic library, ACM digital library, EBSCOhost BusinessSource Premier, and ScienceDirect in an initial explorative literature review to identify key publications and relevant related search terms. Seeing that the basic concepts underlying human-AI hybrids have been studied in various disciplines and research streams (e.g., IS, HCI, HRI, HMI, engineering, and management), we decided to cover the three major elements with our search string. First, we included the “human” element in human-AI hybrids. Our second concern was with “artificial intelligence”, including the short form “AI”, which is used to account for relevant terminological variations related to the context of systems or applications, such as “AI-based”, “AI-enhanced”, and “AI-enabled”. Our third concern was with “hybrid” and “collaboration” since both terms are often used to denote the interworking of human agents and AI-enabled systems. We applied this composite search string – (“Human”) AND (“Artificial Intelligence” OR “AI”) AND (“Hybrid” OR “Collaboration”) – to the aforementioned databases. Searching titles and abstracts resulted in 595 relevant publications, all of which we screened for exclusion. We, first, discarded publications that while containing our search string were unrelated to the field of human-AI hybrids. We then performed a detailed review of the remaining articles to exclude all those with no information on relevant characteristics of human-AI hybrids. After screening titles, abstracts, and full texts, we obtained a sample of 32 articles, whereupon we applied a forward-backward search and arrived at a final number of 49 relevant articles. These articles cover a broad range of different perspectives on the subject matter. Thus, we found that we could build our research on a broad knowledge base that encompasses current debates, theories, and taxonomies in the realm of human-AI hybrids.

Subsequently, we put together a sample of human-AI hybrids. To ensure the relevance of this sample, we added a fourth block to our search string related to practical applications: “use case”, “case study”, “pilot project”, “application”, and “prototype”. In this second round of literature review, we also looked at an additional database, namely the IEEE Xplore digital library, as it contains more case studies and application-oriented publications. We refrained from including this database in the initial review because papers in the library are usually less focused on foundational studies but more on the results of application. In this second literature review, our initial search of titles and abstracts resulted in 390 publications of interest. Upon screening the titles, abstracts, and keywords of those publications, we excluded those unrelated to human-AI hybrids, then read the full text of each remaining article, and dismissed those that did not feature at least one well-described human-AI hybrid use case. Based on this, we were able to reduce the number of publications to 21. Again, we applied a forward-backward search to ensure that we cover relevant publications related to our topic. Furthermore, we searched several search engines (i.e., Google Scholar, Semantic Scholar, and Scopus) for relevant practice-oriented articles and books. Ultimately, we were able to identify 29 publications that provided a total of 95 use cases and a sample of 101 human-AI hybrids (see Table A. 1).

Table A. 1: Sample of human-AI use cases and hybrids

| References                  | Use cases                                           | Human-AI hybrids                                                   |
|-----------------------------|-----------------------------------------------------|--------------------------------------------------------------------|
| Agrawal et al. (2018)       | Chisel Legal Document Processing                    | Human legal employee + AI-enabled document processing system       |
|                             | Grammarly Spelling Correction                       | Human editor + AI-enabled spelling correction system               |
|                             | Atomwise Drug Prediction                            | Human researcher + AI-enabled drug prediction system               |
| Ansari et al. (2019)        | Prescriptive Maintenance for CPP                    | Human maintenance manager + AI-enabled maintenance analysis system |
|                             |                                                     | Human knowledge engineer + AI-enabled maintenance analysis system  |
| Berger et al. (2021)        | Call Center Estimation                              | Forecaster + AI-enabled analysis system                            |
| Daugherty and Wilson (2018) | Rio Tinto                                           | Human machine controllers + AI-enabled mining machinery system)    |
|                             |                                                     | Data analyst + AI-enabled mining machinery system                  |
|                             | Fanuc                                               | Human worker + AI-enabled robotic support system                   |
|                             | Hitachi                                             | Human worker + AI-enabled big data analysis system                 |
|                             | Inertia Switch                                      | Human agent + AI-enabled system                                    |
|                             | Fraunhofer Institute of Material Flow and Logistics | Assembly worker + AI-enabled assembly line control system          |

|                         |                                              |                                                                |
|-------------------------|----------------------------------------------|----------------------------------------------------------------|
|                         |                                              | Process engineer + AI-enabled assembly line control system     |
|                         | GE Reimagined Maintenance                    | Human agent + AI-enabled maintenance system                    |
|                         | GE Reimagined product development            | Human agent + AI-enabled sensor system                         |
|                         | Kiva Robots                                  | Human agent + AI-enabled robots                                |
|                         | Symbolic robots                              | System operator + AI-enabled packing robots                    |
|                         | Procter & Gamble                             | Human agent + AI-enabled supply chain system                   |
|                         | Accenture Precision Agriculture Service      | Farmer + AI-enabled agriculture system                         |
|                         | Anti-Money-Laundering Detection              | Human investigator + AI-enabled detection system               |
|                         | Virgin Trains inSTREAM                       | Human reviewer + AI-enabled review system                      |
|                         | HireVue Unilever's process for hiring        | Human investigator + AI-enabled detection system               |
|                         | Gigster Code Assistant                       | Human developer + AI-enabled code assistant system             |
|                         | SEB Amelia Customer Service                  | Human service agent + AI-enabled interaction system            |
|                         |                                              | Human supervisor + AI-enabled interaction system               |
|                         | Quid Natural-Language Processing             | Human investor + AI-enabled NLP system                         |
|                         | GNS REFS                                     | Human researcher + AI-enabled reverse engineering system       |
|                         | Nike Sprinting Shoe                          | Human designer + AI-enabled 3D design system                   |
|                         | SigOpt General Optimization                  | Human researcher + AI-enabled Prompting system                 |
|                         | Numerate                                     | Human researcher + AI-enabled identification system            |
|                         | Coca-Cola Einstein                           | Human retail employee + AI-enabled cooler managing system      |
|                         | Philips Hue smart lighting                   | Human replacement service worker + AI-enabled detection system |
|                         | Ralph Lauren Smart Mirror                    | Human associate + AI-enabled smart mirror system               |
|                         | Percolata Staffing Scheduling                | Staff managers + AI-enabled staff schedule system              |
|                         | 6sense mailing service                       | Human salesperson + AI-enabled marketing system                |
|                         | Yahoo language-processing system             | Human linguistic trainer + AI-enabled NLP system               |
|                         | BlackRock quantamental funds                 | Human investor + AI-enabled detection system                   |
|                         | ZestFinance Loan Application                 | Human employee + AI-enabled loan application system            |
|                         | Autodesk                                     | Human designer + AI-enabled design system                      |
|                         | Phillips Illumeo Radiology                   | Human investigator + AI-enabled detection system               |
| Davenport et al. (2020) | Online retailing AI (e.g., Birchbox)         | Human retail agent + AI-enabled prediction system              |
|                         | Fashion-related AI (e.g., Stitch Fix)        | Human stylist + AI-enabled product curation system             |
|                         | Sales AI (e.g. Conversica)                   | Human sales agent + AI-enabled chat bot system                 |
|                         | Customer screening AI (e.g. Kanetix)         | Human insurance agent + AI-enabled prediction system           |
|                         | Business process AI (e.g., Bank of Montreal) | Human service agent + AI-enabled analysis system               |

|                                                                                                        |                                                                                                             |                                                                   |
|--------------------------------------------------------------------------------------------------------|-------------------------------------------------------------------------------------------------------------|-------------------------------------------------------------------|
|                                                                                                        | Retail store AI (e.g., Café X)                                                                              | Human sales associate + AI-enabled sales assistant system         |
|                                                                                                        | Security AI (e.g., Knightscope's K5)                                                                        | Human security personnel + AI-enabled sensor system)              |
| Davenport and Kirby (2015)                                                                             | Gongos Consumer Insights                                                                                    | Human marketing researcher + AI-enabled marketing analysis system |
|                                                                                                        | Berg Drug Discovery                                                                                         | Human chemist researcher + AI-enabled biochemist analysis system  |
| Davenport (2018)                                                                                       | Vanguard Personal Advisor Services                                                                          | Human advisor + AI-enabled investment advice system               |
|                                                                                                        | Bank of New Zealand Intel Saffron                                                                           | Human investigator + AI-enabled transaction investigation system  |
|                                                                                                        | Lola Travel Agent                                                                                           | Human travel agent + AI-enabled travel recommendation system      |
|                                                                                                        | Danske Bank Denmark                                                                                         | Human employee + AI-enabled online behavior analysis system       |
|                                                                                                        | Digital Reasoning Employee Monitor                                                                          | Human investigator + AI-enabled investigation system              |
|                                                                                                        | Kone Technician Dispatching System                                                                          | Human technician + AI-enabled dispatching system                  |
|                                                                                                        | Everstring Customer Insights                                                                                | Human salesperson + AI-enabled customer insight system            |
| Doltsinis et al. (2018)                                                                                | Hybrid Ramp-up Process                                                                                      | Human operator + AI-enabled ramp-up system                        |
| Green and Chen (2019)                                                                                  | Risk Assessment                                                                                             | Human judges + AI-enabled risk assessment system                  |
| Grønsund and Aanestad (2020)                                                                           | Configuration upon the introduction of the algorithm: auditing and altering conducted by the data scientist | Human data scientist + AI-enabled processing system               |
|                                                                                                        | Reconfiguration involving domain experts in auditing and data scientist in altering of the algorithm        | Human data scientist + AI-enabled processing system               |
|                                                                                                        |                                                                                                             | Human domain experts + AI-enabled processing system               |
| Reconfiguration repurposing the role of the researcher and enrolling data analyst to the auditing work | Human researcher + AI-enabled processing system                                                             |                                                                   |
|                                                                                                        | Human data analyst + AI-enabled processing system                                                           |                                                                   |
| Heer (2019)                                                                                            | Collaborative Interface for Data Wrangling                                                                  | Human data analyst + AI-enabled data wrangling system             |
|                                                                                                        | Collaborative Interface for Exploratory Analysis                                                            | Human data analyst + AI-enabled analysis system                   |
|                                                                                                        | Collaborative Interface for Natural Language Translation                                                    | Human data analyst + AI-enabled NLP system                        |
| Iansiti and Lakhani (2020)                                                                             | Walmart AI-enabled Supermarket Stores                                                                       | Human salesperson + AI-enabled customer analysis system           |
|                                                                                                        | Alipay Credit Service                                                                                       | Human data analyst + AI-enabled credit system                     |
|                                                                                                        | Ocado Automated Warehouse                                                                                   | Human picking employee + AI-enabled automated warehouse system    |
|                                                                                                        | Fidelity Investment                                                                                         | Human advisor + AI-enabled investment advice system               |
| Jussupow et al. (2021)                                                                                 | Diagnostics                                                                                                 | Human physician + AI-enabled medical diagnosis system             |
| Kahn et al. (2020)                                                                                     | Call Center Customer Service                                                                                | Human call center agent + AI-enabled call center system           |
| Klumpp (2018)                                                                                          | Automated driving                                                                                           | Human truck driver + AI-enabled driving systems                   |
| Lai et al. (2020)                                                                                      | Smart augmented instruction system for mechanical assembly                                                  | Human worker + AI-enabled smart assist system                     |
| Liew (2018)                                                                                            | Detection and prediction automation                                                                         | Human radiologist + AI-enabled radiologic analysis system         |
|                                                                                                        | Intelligence augmentation                                                                                   | Human radiologist + AI-enabled radiologic analysis system         |
|                                                                                                        | Radiological decision support systems                                                                       | Human radiologist + AI-enabled decision support system            |

|                                |                                                                        |                                                            |
|--------------------------------|------------------------------------------------------------------------|------------------------------------------------------------|
| McAfee and Brynjolfsson (2017) | Civis Analytics                                                        | Human data analyst + AI-enabled scoring system             |
|                                | Google Hiring Process                                                  | Human HR employee+ AI-enabled scoring system               |
|                                | Fukoku Mutual Life                                                     | Human data analyst + AI-enabled scoring system             |
|                                | IBM Watson Kinases Detection                                           | Human researcher + AI-enabled kinases detection system     |
|                                | Shanghai Tower                                                         | Human architect + AI-enabled building design system        |
| Mirbabaie et al. (2021)        | Virtual Assistant                                                      | Human agent + Virtual Assistant                            |
| Paschen et al. (2020)          | Prospecting                                                            | Human marketing agent + AI-enabled prospecting system      |
|                                | Pre-approach and Approach                                              | Human marketing agent + AI-enabled marketing system        |
|                                | Presentation                                                           | Human marketing agent + AI-enabled marketing system        |
|                                | Overcoming objections and Closing                                      | Human marketing agent + AI-enabled marketing system        |
|                                | Follow-up                                                              | Human marketing agent + AI-enabled marketing system)       |
| Schmitt et al. (2020)          | Predictive model-based quality inspection                              | Human employee + AI-enabled quality prediction system      |
| Shin et al. (2021)             | AI-assistance for predictive maintenance                               | Human inspector + AI-enabled predictive maintenance system |
| Sowa et al. (2021)             | Chat bot for decision making in marketing                              | Human decision maker + AI-enabled virtual assistant        |
| Syam and Sharma (2018)         | Finovate Robo-Advisors                                                 | Human advisor + AI-enabled robo advisor system             |
|                                | Harley-Davidson Lead Generation                                        | Human salesperson + AI-enabled marketing analysis system   |
|                                | Gainsight Sales Management                                             | Human salesperson + AI-enabled sales analysis system       |
|                                | LG Smartphone Service                                                  | Human service personnel + AI-enabled service system        |
| Tsang et al. (2018)            | Cold Supply Risk Management System                                     | Human logistics worker+ AI-enabled risk management system  |
| van Dun et al. (2023)          | Consideration of domain knowledge by incorporating a human in the loop | Human domain expert + AI-enabled ProcessGAN system         |
| Yin et al. (2013)              | Collaborative Interface for Aero-Engine Pipe Routing                   | Human designer + AI-enabled design system                  |
| Zhang et al. (2021)            | Goods Storing                                                          | Human worker + AI-enabled storing system                   |
|                                | Order Picking                                                          | Human worker + AI-enabled picking system                   |
|                                | Order Packing                                                          | Human worker+ AI-enabled packing system                    |

### Appendix 2: Taxonomy Development Process

In the following, we provide details on our four iterations of taxonomy development following the steps displayed in Fig. A. 1.

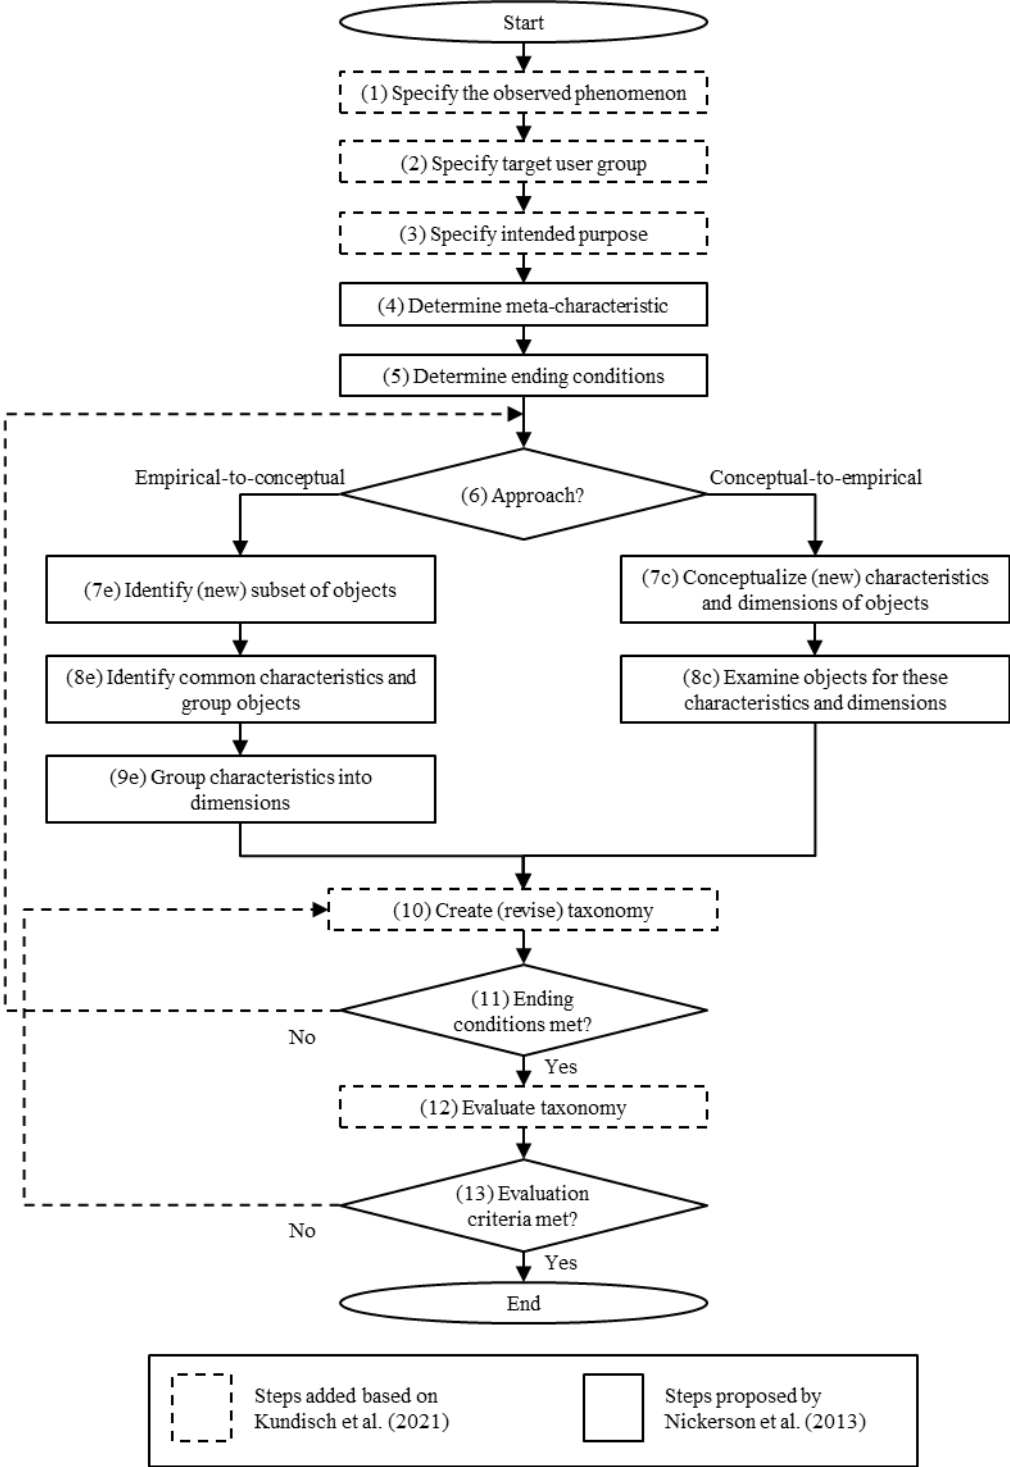

Figure A. 1: Adopted taxonomy development method based on Kundisch et al. (2022)

Step 1: We specified the observed phenomenon as human-AI hybrids. More specifically, upon reviewing the discussion on human agents and AI-enabled systems, we observed the dominantly in binary terms conducted discussion of human agents and AI-enabled systems as rivals fighting for the other's jobs in the context of human-AI hybrids.

Step 2: We defined our target user group to IS researchers and researchers from other fields related to the topic of human-AI hybrids (e.g., HCI, (cognitive) psychology) along with high- and mid-level decision-makers concerned with the use and integration of AI. We chose this target user group because, agreeing with Sarker et al. (2019), we feel a strong obligation to encourage a more nuanced discussion about the integration of AI in the future of work. Most likely, however, it will be organizations and their respective decision-makers who will drive the symbiotic interworking of humans and AI within those organizations, which is why we include them in the compass of this study, the aim being to facilitate a better understanding and thus stimulate the creation of new human-AI hybrids.

Step 3: We specified the purpose of our taxonomy to understanding what characterizes the symbiotic interworking of human agents and AI-enabled systems when they augment one another.

Step 4: We defined “the relevant properties of the collaborative interworking of human agents and AI-enabled systems” to be the meta-characteristic for developing our taxonomy.

Step 5: We defined our objective ending conditions: at least one object is classified to possess every characteristic of every dimension, no new dimensions or characteristics were added in the last iteration, no dimensions or characteristics were merged nor split in the last iteration, every dimension is unique, and every characteristic is unique within its dimension.

We also defined the subjective ending conditions: concise, robust, comprehensive, extendible, and explanatory. We chose these ending conditions because they ensured sufficient comprehensiveness as well as manageability in every iteration.



## Iteration 1

Step 6: Since we identified a diverse existing body of knowledge on human-AI collaboration, we decided to use it as starting point for our taxonomy development process. That is, we applied a conceptual-to-empirical approach in our first iteration.

Step 7c: In Iteration 1, we first analyzed the existing body of knowledge in the form of scientific contributions and studies based on an extensive literature review on the state-of-the-art of human-AI hybrids. During this process, we also found that the concept behind human-AI hybrids is researched by various disciplines and research streams (e.g., information systems, human-computer interaction, human-robot interaction, human-machine interaction, engineering, and management.). Consequently, our literature review provided us with a broad foundation concerning current debates and theories but also existing taxonomies.

Subsequently, three of the authors discussed the relevant articles from our literature review and their contributions to the understanding of human-AI hybrids in an iterative process. That is, going through our sample of existing literature on human-AI hybrids, we added, merged, and, if necessary, removed identified characteristics and dimensions into an initial version of our taxonomy. Driven by the purpose of our taxonomy (understanding the characteristics of the collaborative interworking of human agents and AI-enabled systems to augment and enhance each other), we aimed to obtain a comprehensive picture of the integral parts of human-AI hybrids. Drawing from weak sociomateriality and its five constituting dimensions (materiality, inseparability, relationality, performativity, and practice) as justificatory knowledge, enabled us to leverage insights that go beyond a mere accumulation of characteristics and dimensions. Focusing on sociomaterial practices in human-AI hybrids, for example, helped us understand that the interaction from the human to the AI and vice versa results in a higher-level entanglement of both. As a result, we identified both the interaction from the human to the AI and the interaction from the AI to the human as relevant for an explanation of the collaborative interworking in human-AI hybrids and, therefore, implemented them in our taxonomy.

Additionally, weak sociomateriality helped us to identify *human* and *AI* as separate entities of human-AI hybrid assemblages (Barad 2007), and sociomaterial practices as a result of their entangled

interworking (Leonardi 2013). As a result, we implemented *human*, *AI*, and *socialmaterial practices* (*initially task*) as sociomaterial entites into our taxonomy to further structure our relevant dimensions. In our first iteration, we also established *structure* as a fourth entity, but later refrained from using it due to a missing fit to the purpose of our taxonomy.

Step 8c: Since we already identified a minor amount of human-AI hybrids in our initial literature review, we were able to validate the characteristics and dimensions identified in iteration 1 by evaluating their applicability on those human-AI hybrids (Varshney 2014). This also allowed us to confirm that all entities, dimensions, and characteristics were in line with our meta-characteristic.

Step 10: After grouping the relevant dimensions and characteristics, we created a first version of our taxonomy T1 comprising 4 entities, 11 dimensions and 40 characteristics. Following the taxonomy notation of Nickerson et al. (2013), we describe a taxonomy  $T$  as a set of  $n$  entities  $E_i$  ( $i = 1, \dots, n$ ) with  $m$  dimensions  $D_{ij}$  ( $j = 1, \dots, m$ ) each consisting of  $o_{ij}$  ( $o_{ij} \geq 2$ ) characteristics  $C_{ijk}$  ( $k = 1, \dots, o_{ij}$ ):

$$T = \left\{ E_i, i = 1, \dots, n \mid E_i = \left\{ D_{ij}, j = 1, \dots, m \mid D_{ij} = \left\{ C_{ijk}, k = 1, \dots, o_{ij}; o_{ij} \geq 2 \right\} \right\} \right\}$$

T1 = {

*Human* {Core cognitive functions {Empathy, Judgement, Creating, Problem-solving, Decision-making}, Actions {Improve, Supplement, Facilitate}, Roles {Trainer, Explainer, Sustainer}},

*AI* {Core cognitive functions {Reasoning, Predicting, Planning, Decision-making, Organizing, Communicating, Creating}, Actions {Guide, Improve, Replace}, Roles {Amplifier, Interactor, Embodier}},

*Task* {Human-AI relationship {Competition, Interworking, Augmentation}, Process adaptation {None, Transformation}, Learning {AI learns, Human learns, Both learn}},

*Structure* {Resources {Data, Algorithms, Robots, Humans, IT infrastructure}, Requirements {Task specification, Performance metrics, Training experience}}

}.

Step 11: The taxonomy resulting from iteration 1 neither met all our subjective nor our objective ending conditions. Notably, we were not able to classify at least one object under every characteristic of every dimension. Moreover, it was apparent that the first version of our taxonomy was neither comprehensive nor concise. Hence, we decided to perform another iteration.

## **Iteration 2**

Step 6: To enrich our perspective on human-AI hybrids with insights from other researchers and to account for additional relevant publications not identified in our initial literature review, we decided to perform another conceptual-to-empirical iteration based on a panel discussion with other IS researchers.

Step 7c: In iteration 2, we thus discussed the first version of our taxonomy in a large panel (30+ participants) that included IS researchers with a broad range of research foci (e.g., AI, innovation management, Internet of Things (IoT), and strategic IT management). This heterogeneous panel enabled an interdisciplinary discussion of the results of our taxonomy development process. This discussion led to the discovery of additional research streams and topics of interest (e.g., human-robot interaction, a sociological perspective on human-AI hybrids, and potential focus areas of human agents and AI-enabled systems in human-AI hybrids).

After performing a supplementary literature review and analysis based on the input from the discussion, we adjusted our taxonomy. That is, we refined some of our dimensions (e.g., we added *automation* and removed *interworking* from the *paradigm* dimension) and added additional relevant characteristics (e.g., we added a *human and AI learn* characteristic to the *learning* dimension). We also identified additional relevant dimensions, such as the *form of interworking* and *time*. Moreover, we decided to eliminate the *structure* entity because it was not seen as a matter of the concrete collaboration of human agents and AI-enabled systems (i.e., sociomaterial practices), but rather of the environment in which a human-AI hybrid is established.

Step 8c: Again, we validated the resulting characteristics and dimensions with an application of our taxonomy on some of the human-AI hybrids we identified during our literature review. We also ensured that new characteristics were in line with our meta-characteristic.

Step 10:

At the end of iteration 2, our taxonomy T2 comprised 3 entities, 11 dimensions and 43 characteristics.

T2 = {

*Human* {Core cognitive functions {Empathy, Judgement, Creating, Problem-solving, Decision-making}, Actions {Improve, Supplement, Facilitate}, Roles {Trainer, Explainer, Sustainer}},

*AI* {Core cognitive functions {Reasoning, Predicting, Planning, Decision-making, Organizing, Communicating, Creating}, Actions {Guide, Improve, Replace}, Roles {Amplifier, Interactor, Embodier}},

*Task* {Paradigm {Automation, Augmentation, Competition}, Process adaptation {None, Transformation}, Form of interworking {Parallel, Sequential, Mixed}, Time {Synchronous, Asynchronous, Mixed}, Learning {AI learns, Human learns, Human and AI learn, Co-evolution}}

}.  
}

Step 11: The taxonomy resulting from iteration 2 neither did meet all our subjective nor our objective ending conditions. Analyzing the validation results, we concluded that our taxonomy was concise, extendible, and explanatory. However, the taxonomy was not yet comprehensive because not all human-AI hybrids from the sample could be classified. Moreover, we found that the robustness of our taxonomy could still be improved. Therefore, we decided to perform a third iteration.

### **Iteration 3**

Step 6: To account for the comprehensiveness and robustness of our taxonomy, we decided to analyze and classify existing human-AI hybrids by applying an empirical-to-conceptual approach.

Step 7e: Therefore, in iteration 3, we resorted to our compiled sample of 101 human-AI hybrids. Choosing a diverse subset of hybrids from this sample, three of the co-authors iteratively discussed every hybrid and its classification with our taxonomy. We focused on identifying common attributes as

well as differentiators in our hybrids and tested the entities, dimensions, and characteristics of our taxonomy accordingly.

Step 8e: During the analysis of the hybrid subset, we found that AI-enabled systems can also supplement human agents by complementing their cognitive functions to perform tasks collaboratively. We also found cases where the human agent audits the results of an AI-enabled system to ensure a correct output. Moreover, human agents in our human-AI hybrids also assumed the role of a cognitive as well as a physical co-worker based on their specific contribution to the completion of a task.

All identified characteristics were in line with our meta-characteristic as they represent relevant properties of the collaborative interworking between human agents and AI-enabled systems.

Step 9e: As AI-enabled systems *supplementing* human agents clearly is a relevant action, we integrated it into the *action* dimension of the *AI* entity. Additionally, we renamed this dimension to *interplay AI2H* to better reflect the fact that it is an action directed towards the human. Correspondingly, we also renamed the *action* dimension of the *human* entity to *interplay H2AI*. Moreover, we integrated *audit* as an additional characteristics of the *interplay H2AI* dimension. We added clarification to the respective *roles* dimensions of the entities *human* and *AI* by renaming them to *roles of AI* and *roles of humans*. As they fit the context of roles, we also integrated *physical co-worker* and *cognitive co-worker* in the *roles* dimension of the *human* entity.

Step 10: At the end of iteration 3, our taxonomy T3 comprised 3 entities, 11 dimensions and 41 characteristics.

T3 = {

*Human* {Human CF {Empathizing, Judging, Creating, Problem-solving, Decision-making},  
Interplay H2AI {Improve, Supplement, Facilitate, Audit}, Roles of humans {Trainer, Explainer,  
Sustainer, Cognitive co-worker, Physical co-worker}}},

*AI* {AI CF {Reasoning, Predicting, Planning, Decision-making, Organizing, Communicating,  
Creating}, Interplay AI2H {Guide, Supplement, Correct, Replace}, Roles of AI {Amplifier,  
Interactor, Embodier}}},

*Task* {Paradigm {Automation, Augmentation, Competition}, Process adaptation {None, Transformation}, Form of interworking {Parallel, Sequential}, Time {Synchronous, Asynchronous}, Learning {AI learns, Human learns, Human and AI learn, Co-evolution}}

}.  
}

Step 11: The classification of human-AI hybrids resulted in a few additions of characteristics as well as some minor changes to the wording of dimensions. Therefore, we concluded that our taxonomy was now more comprehensive and robust than before. However, as we performed modifications to our taxonomy, we still did not meet our objective ending conditions. Hence, we decided to perform an additional fourth iteration.

#### **Iteration 4**

Step 6: To cross-check the validity of the results from the analysis and discussion of human-AI hybrids in the previous iteration as well as the robustness and comprehensiveness of our taxonomy, we again adopted an empirical-to-conceptual approach based on the classification of human-AI hybrids.

Step 7e: To confirm the validity and the applicability of the latest version of our taxonomy, we randomly selected additional human-AI hybrids from our sample and discussed and classified them.

Step 8e: These discussions and classifications did not lead to the identification of new entities, dimensions, or characteristics.

Step 9e: Consequently, we did not change any of the characteristics and dimensions of our taxonomy.

Step 10: Thus, we also did not revise the taxonomy.

Step 11: As a result, iteration 4 also met the last two open objective endings conditions (“no new dimensions or characteristics were added in the last iteration” and “no dimensions or characteristics were merged or split in the last iteration”). As all objective ending conditions were met and the authors agreed that the taxonomy fulfilled all subjective ending conditions (“concise”, “robust”, “comprehensive”, “extendible”, and “explanatory”), we decided to terminate the taxonomy development

process after this iteration (Nickerson et al. 2013). Thus, the final version of our taxonomy comprises 3 entities, 11 dimensions and 41 characteristics.

### Appendix 3: External Taxonomy Evaluation

To evaluate our taxonomy, we performed eight semi-structured interviews with experts from practice and academia (see Tab. A. 2). In these interviews, we discussed both the taxonomy itself and its application to human-AI hybrids. Based on these interviews, we revised and refined the dimensions and the characteristics of our taxonomy (Step 10) (Kundisch et al. 2022).

Table A. 2: Overview of interviews

| <b>ID</b> | <b>Role of the Interview Partner</b> | <b>Industry/ Research focus</b>               |
|-----------|--------------------------------------|-----------------------------------------------|
| I1        | Chief Enterprise Architect           | Information and communication technology      |
| I2        | Project Manager                      | Software solutions company                    |
| I3        | Co-Founder                           | Real estate information provider              |
| I4        | Research Assistant                   | Research focus on machine learning, medical   |
| I5        | Data Scientist                       | Building society                              |
| I6        | Assistant to the CIO/COO             | Industrial insurance company                  |
| I7        | Research Assistant                   | Research focus on machine learning, strategic |
| I8        | Research Assistant                   | Research focus on data science and business   |

Additionally, we asked our interviewees about the understandability, completeness, and robustness of our taxonomy as well as its suitability for the real world in relation to its purpose (Sonnenberg and vom Brocke 2012). Thus, we also iteratively optimized our taxonomy based on these evaluation criteria. Our approach enabled us to quickly iterate through relevant changes as we were able to evaluate them with each new interview. In each interview, we also presented a visual representation of our taxonomy highlighting the changes of previous iterations. Thus, we could focus the discussion with our interviewees on those relevant parts. We terminated our evaluation process when our interviewees confirmed that all our evaluation criteria were met. Our final taxonomy comprises 3 entities, 9



dimensions, and 38 characteristics. In the following, we list details on the changes performed after each interview.

#### Interview 1

- We added *perceiving* as a characteristic to the dimension *AI CF* because this cognitive function is a valid contribution option for AI-enabled systems.
- We renamed the characteristic *mixed* to *agile* in the dimension *form of interworking* because it better describes how a human agent, and an AI-enabled system may interwork.
- We removed *organizing* as a characteristic from the dimension *AI CF* because organizing rather is a composition of a variety of cognitive functions.

#### Interview 2

- We removed the dimension *paradigm* from the entity *task* because it did not properly fit the purpose of our taxonomy.
- We removed the dimension *process adaptation* from the entity *task* because it is rather related to the environment than to the collaboration between human agent and AI-enabled system.
- We removed the characteristic *mixed* from the dimension *time* because its occurrence in real-world applications is rather unrealistic.
- We removed the dimension *roles of AI* from the layer *AI* because it highly overlaps with the dimension *interplay AI2H*.
- We added the dimension *AI focus* with corresponding characteristics *automation*, *augmentation*, and *optimization* to the entity *AI* to account for AI-enabled systems' different areas of focus.
- We removed the dimension *roles of humans* from the entity *human* because it highly overlaps with the dimension *interplay H2AI*.
- We added the dimension *human focus* with corresponding characteristics *sensemaking*, *creativity*, *compassion*, and *utility* to the entity *human* to account for human agents' different areas of focus.
- We renamed the characteristic *communicating* to *interacting* in the dimension *AI CF* because it better describes the level of the cognitive function.

- We added the characteristic *reasoning* to the dimension *human CF* because human agents may also contribute to human-AI hybrids with their ability of reasoning.
- We removed the characteristic *problem-solving* from the dimension *human CF* because *problem-solving* rather is enabled by different cognitive functions.

#### Interview 3

- We removed the characteristic *judging* from the dimension *human CF* because *judging* also rather is enabled by different cognitive functions.
- We renamed the characteristic *evaluate* to *audit* in the dimension *interplay H2AI* because it is more precise and enables a description of a broader set of applications.

#### Interview 4

- We renamed the characteristic *AI and human learn* to *AI and human learn separately* in the dimension *learning* to avoid confusion.
- We renamed the dimension *AI CF* to *AI cognitive functions* in the layer *AI* to increase understandability and to avoid unnecessary abbreviations.
- We also renamed the dimension *human CF* to *human cognitive functions* in the layer *human* for the same reason.
- We added a column to our taxonomy to indicate whether dimensions are mutually exclusive.

#### Interview 5

- We added the characteristic *none* to the dimension *learning* because it is possible that neither the human agent nor the AI-enabled system learns in specific settings.
- We renamed the characteristic *correcting* to *verifying* in the dimension *interplay AI2H* because *verifying* better describes the interplay of an AI-enabled system toward a human agent.
- We renamed the characteristic *auditing* to *verifying* in the dimension *interplay H2AI* because this characteristic describes an analogous interplay for both human agents and AI-enabled systems.

- We reordered the characteristics in the dimensions *interplay AI2H*, *interplay H2AI*, *AI cognitive functions*, and *human cognitive functions* in an ascending ordinal order because of comprehensibility.

#### Interview 6

- We renamed the characteristic *agile* to *flexible* in the dimension *form of interworking* because the term *agile* implicates properties that are not directly related to human-AI hybrids.
- We removed the characteristic *optimization* from the dimension *AI focus* because it does not reflect the same level of granularity as augmentation and automation.
- We renamed the dimension *interplay AI2H* to *interaction AI to human* in the entity *AI* to increase the comprehensibility of our taxonomy.
- We renamed the characteristic *guide* to *facilitate* in the dimension *interaction AI to human* because this term better reflects the supporting manner of interaction toward human agents.
- We renamed the dimension *interplay H2AI* to *interaction human to AI* in the entity *human* to increase the comprehensibility of our taxonomy.
- We renamed the characteristic *utility* to *flexibility* in the dimension *human focus* because this term better represents the actual focus of human agents.

#### Interview 7

- We renamed the entity *task* to *process* because the collaboration process better reflects the overarching dimensions of human-AI hybrids.
- We added the characteristics *perceiving*, *predicting*, *planning*, and *interacting* to the dimension *human cognitive functions* because human agents are also able to perform such functions.
- We added the characteristic *explaining* to the dimension *human cognitive functions* because human agents contribute their ability to explain complex circumstances to human-AI hybrids.
- We removed the dimension *time* in the entity *process* because it proved difficult to determine the specific characteristics when analyzing human-AI hybrids.

- We added a dimension *mode of interworking* with corresponding characteristics *singular* and *continuous* to the entity *process* because this dimension provides important distinctions concerning the interworking of human agents and AI-enabled systems.

#### Interview 8

- We removed the characteristic *replace* from the dimension *interaction AI to human* because this characteristic overlaps strongly with the characteristic *supplementing*.
- We removed the characteristic *improve* from the dimension *interplay human to AI* because this characteristic overlaps strongly with the characteristic *facilitating*.

In line with Kundisch et al. (2022), we decided to re-examine recent literature in the field of sociomateriality after evaluating our taxonomy. Based on this examination and intensive discussions in the author team, we decided to rename the entity *process* to *sociomaterial practices* to increase the comprehensibility of our taxonomy and better reflect sociomateriality as our justificatory knowledge.

#### **Appendix 4: Internal Taxonomy Validation**

For a final validation of our taxonomy, three of the authors classified a random sample of thirteen human-AI hybrids as the basis for calculating the quality of agreement using Fleiss' (1971) kappa coefficient. All authors used the same sources from our sample to ensure comparability. We achieved inter-coder reliability of 65,90% equally weighted among all dimensions. Since a Fleiss' (1971) kappa between 61% and 80% reflects a “substantial” strength of agreement among all coders (Landis and Koch 1977), we can confirm the reliability of our taxonomy.

## Appendix 5: Analysis of Classified Human-AI Hybrids

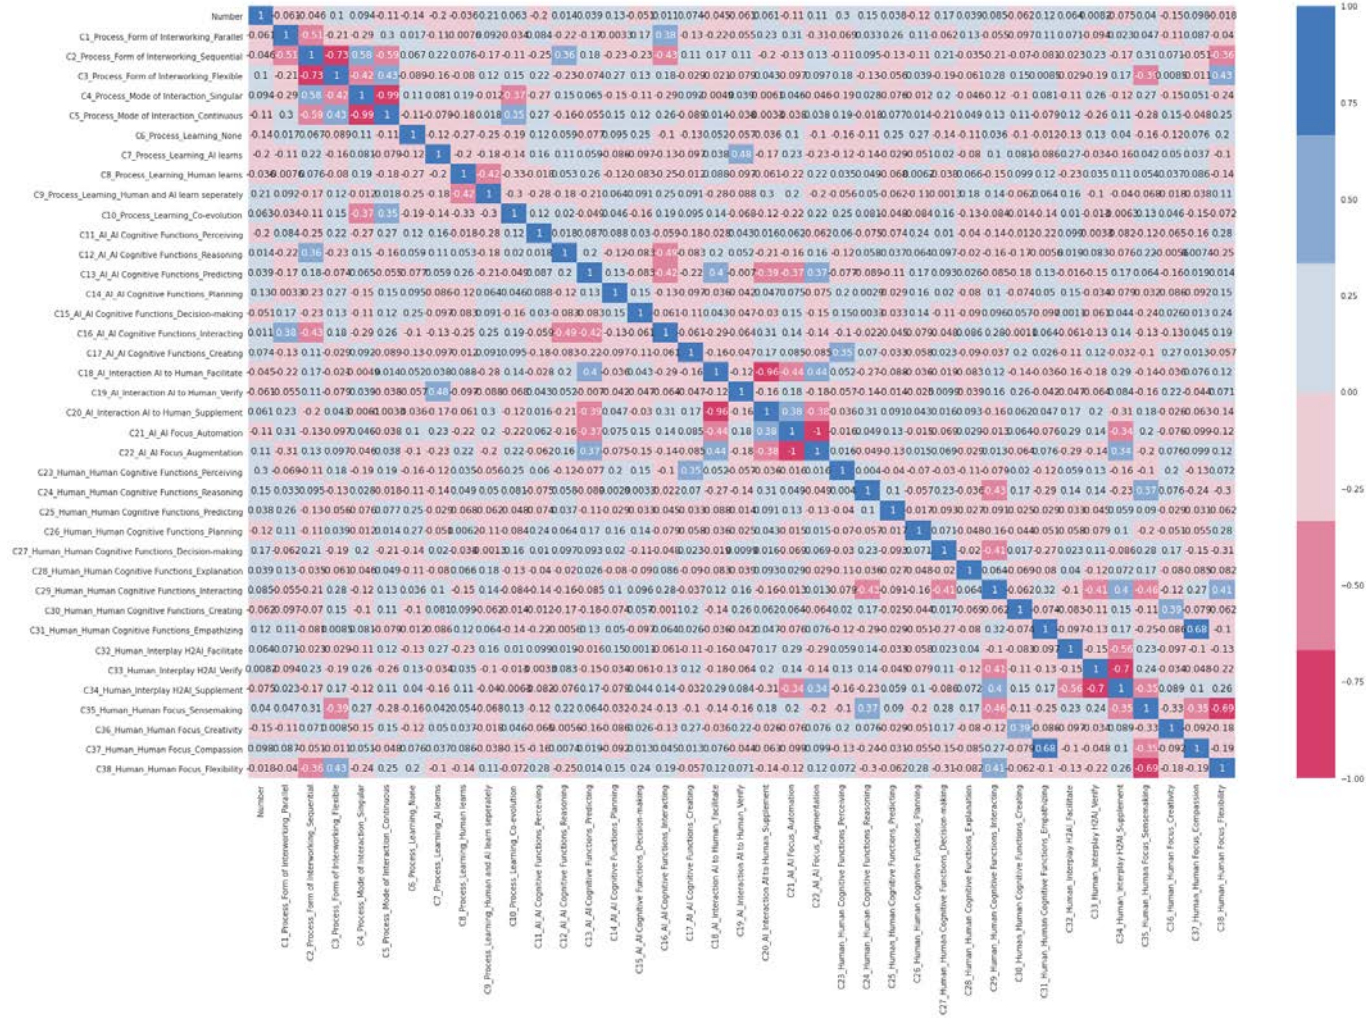

Figure A. 2: Correlation matrix of all variables resulting from our 101 classified human-AI hybrids

### Appendix 6: Clustering of Human-AI Hybrids

Clustering the classified sample of human-AI hybrids built the basis for deriving archetypes. Before being able to accomplish that, however, we needed to determine the number of clusters. We calculated the ideal number of clusters based on various metrics, including but not limited to the Calinski-Harabasz index, the Davies-Bouldin index, the gap statistic, and the silhouette coefficient (Calinski and Harabasz 1974; Davies and Bouldin 1979; Rousseeuw 1987; Tibshirani et al. 2001). According to early indications, the ideal number of clusters appeared to lie between three and seven. Having analyzed the resulting dendrogram (see Figure A. 3), we determined five to be the appropriate number of clusters in our case (Aldenderfer and Blashfield 1984).

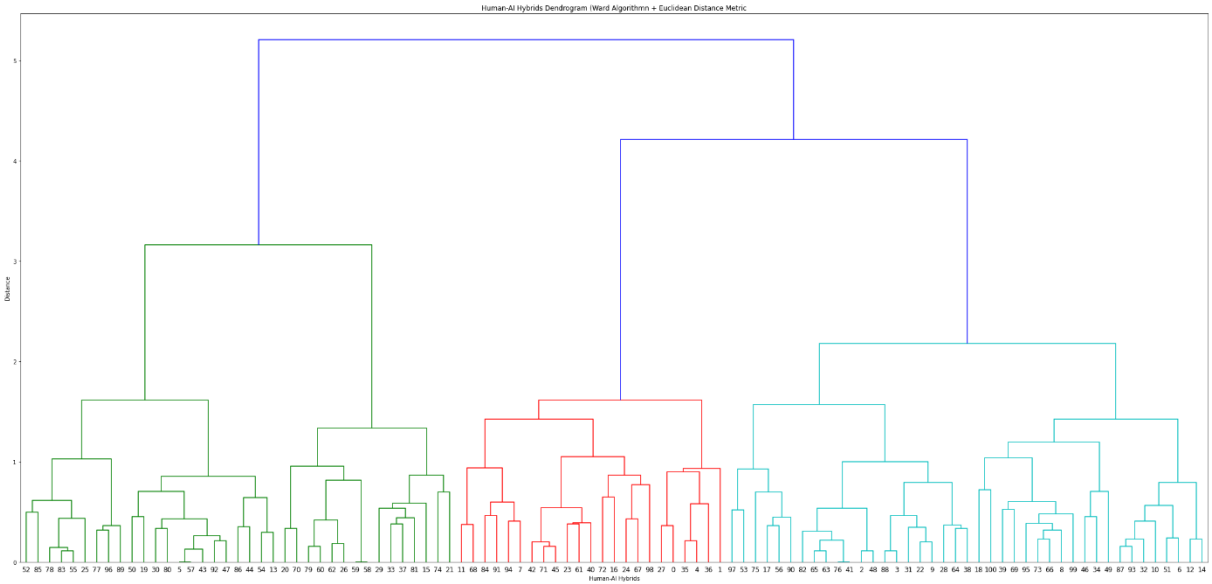

Figure A. 3: Dendrogram of human-AI hybrids clusters based on the Ward's method

## Appendix 7: Overview of Human-AI Hybrid Archetypes

Fig. A. 4 to A. 8 display the classification percentages ( $c$ ) within our archetypes of human-AI hybrids. Characteristics in bold with dark gray background have been found in greater than or equal to sixty-six percent of our sample's cases (bold characteristic  $c \geq 66\%$ ). Characteristics in italics with light gray background have been found in less than sixty-six percent but greater than or equal to thirty-three percent of our sample's cases (italic characteristic  $66\% > c \geq 33\%$ ). Characteristics without special formatting have been found in less than thirty-three percent of cases (standard characteristic  $c < 33\%$ ).

### Archetype 1: Sequential Automation (AI Pre-Worker)

| Layer 1:<br>Sociomaterial<br>entities | Layer 2:<br>Dimensions    |    | Layer 3:<br>Characteristics |                        |                          |               |                                            |                            |                          |                |                  |
|---------------------------------------|---------------------------|----|-----------------------------|------------------------|--------------------------|---------------|--------------------------------------------|----------------------------|--------------------------|----------------|------------------|
| Human<br>(human agency)               | Human cognitive functions | NE | Perceiving (7%)             | <i>Reasoning (60%)</i> | Predicting (0%)          | Planning (0%) | <i>Decision-making (60%)</i>               | Explaining (7%)            | <i>Interacting (40%)</i> | Creating (7%)  | Empathizing (7%) |
|                                       | Interaction human to AI   | ME | Facilitating (13%)          |                        | Verifying (40%)          |               |                                            | Supplementing (47%)        |                          |                |                  |
|                                       | Human focus               | ME | <b>Sensemaking (73%)</b>    |                        | Creativity (7%)          |               | Compassion (7%)                            |                            | Flexibility (13%)        |                |                  |
| AI<br>(material agency)               | AI cognitive functions    | NE | Perceiving (20%)            | <b>Reasoning (93%)</b> | Predicting (27%)         |               | Planning (7%)                              | Decision-making (7%)       | Interacting (7%)         | Creating (20%) |                  |
|                                       | Interaction AI to human   | ME | Facilitating (20%)          |                        | Verifying (7%)           |               |                                            | <b>Supplementing (73%)</b> |                          |                |                  |
|                                       | AI focus                  | ME | <b>Automation (100%)</b>    |                        |                          |               | Augmentation (0%)                          |                            |                          |                |                  |
| Sociomaterial practices               | Form of interworking      | ME | Parallel (0%)               |                        | <b>Sequential (100%)</b> |               |                                            |                            | Flexible (0%)            |                |                  |
|                                       | Mode of interworking      | ME | <b>Singular (100%)</b>      |                        |                          |               | Continuous (0%)                            |                            |                          |                |                  |
|                                       | Learning                  | ME | None (20%)                  | AI learns (13%)        | Human learns (27%)       |               | <i>Human and AI learn separately (40%)</i> |                            | Co-evolution (0%)        |                |                  |

|                                           |
|-------------------------------------------|
| <b><math>c \geq 66\%</math></b>           |
| <i><math>66\% &gt; c \geq 33\%</math></i> |
| $c < 33\%$                                |

Figure A. 4: Sequential automation (AI pre-worker) archetype



## Archetype 2: Parallel Automation (Outsourcing AI)

| Layer 1: Sociomaterial entities | Layer 2: Dimensions       |    | Layer 3: Characteristics |                 |                    |                 |                                     |                 |                     |               |                  |  |
|---------------------------------|---------------------------|----|--------------------------|-----------------|--------------------|-----------------|-------------------------------------|-----------------|---------------------|---------------|------------------|--|
| Human (human agency)            | Human cognitive functions | NE | Perceiving (17%)         | Reasoning (48%) | Predicting (4%)    | Planning (4%)   | Decision-making (30%)               | Explaining (9%) | Interacting (48%)   | Creating (9%) | Empathizing (4%) |  |
|                                 | Interaction human to AI   | ME | Facilitating (26%)       |                 |                    | Verifying (13%) |                                     |                 | Supplementing (61%) |               |                  |  |
|                                 | Human focus               | ME | Sensemaking (65%)        |                 | Creativity (4%)    |                 | Compassion (4%)                     |                 | Flexibility (26%)   |               |                  |  |
| AI (material agency)            | AI cognitive functions    | NE | Perceiving (52%)         | Reasoning (74%) | Predicting (30%)   | Planning (13%)  | Decision-making (22%)               | Explaining (9%) | Interacting (35%)   | Creating (9%) | Empathizing (4%) |  |
|                                 | Interaction AI to human   | ME | Facilitating (13%)       |                 |                    | Verifying (4%)  |                                     |                 | Supplementing (83%) |               |                  |  |
|                                 | AI focus                  | ME | Automation (100%)        |                 |                    |                 | Augmentation (0%)                   |                 |                     |               |                  |  |
| Sociomaterial practices         | Form of interworking      | ME | Parallel (43%)           |                 | Sequential (26%)   |                 |                                     | Flexible (30%)  |                     |               |                  |  |
|                                 | Mode of interworking      | ME | Singular (0%)            |                 |                    |                 | Continuous (100%)                   |                 |                     |               |                  |  |
|                                 | Learning                  | ME | None (17%)               | AI learns (17%) | Human learns (13%) |                 | Human and AI learn separately (39%) |                 | Co-evolution (13%)  |               |                  |  |

Figure A. 5: Parallel automation (outsourcing AI) archetype

## Archetype 3: Sequential Augmentation (Superpower-Giving AI)

| Layer 1: Sociomaterial entities | Layer 2: Dimensions       |    | Layer 3: Characteristics |                 |                    |                 |                                     |                 |                     |               |                   |  |
|---------------------------------|---------------------------|----|--------------------------|-----------------|--------------------|-----------------|-------------------------------------|-----------------|---------------------|---------------|-------------------|--|
| Human (human agency)            | Human cognitive functions | NE | Perceiving (5%)          | Reasoning (59%) | Predicting (0%)    | Planning (5%)   | Decision-making (59%)               | Explaining (5%) | Interacting (36%)   | Creating (0%) | Empathizing (14%) |  |
|                                 | Interaction human to AI   | ME | Facilitating (0%)        |                 |                    | Verifying (23%) |                                     |                 | Supplementing (82%) |               |                   |  |
|                                 | Human focus               | ME | Sensemaking (73%)        |                 | Creativity (0%)    |                 | Compassion (14%)                    |                 | Flexibility (14%)   |               |                   |  |
| AI (material agency)            | AI cognitive functions    | NE | Perceiving (18%)         | Reasoning (95%) | Predicting (77%)   | Planning (0%)   | Decision-making (5%)                | Explaining (9%) | Interacting (0%)    | Creating (9%) | Empathizing (4%)  |  |
|                                 | Interaction AI to human   | ME | Facilitating (59%)       |                 |                    | Verifying (0%)  |                                     |                 | Supplementing (41%) |               |                   |  |
|                                 | AI focus                  | ME | Automation (0%)          |                 |                    |                 | Augmentation (100%)                 |                 |                     |               |                   |  |
| Sociomaterial practices         | Form of interworking      | ME | Parallel (0%)            |                 | Sequential (100%)  |                 |                                     | Flexible (0%)   |                     |               |                   |  |
|                                 | Mode of interworking      | ME | Singular (100%)          |                 |                    |                 | Continuous (0%)                     |                 |                     |               |                   |  |
|                                 | Learning                  | ME | None (18%)               | AI learns (9%)  | Human learns (55%) |                 | Human and AI learn separately (18%) |                 | Co-evolution (0%)   |               |                   |  |

Figure A. 6: Sequential augmentation (superpower-giving AI) archetype

### Archetype 4: Sequential Co-Evolution (Assembly Line AI)

| Layer 1: Sociomaterial entities | Layer 2: Dimensions       |    | Layer 3: Characteristics |                  |                    |                 |                       |                                     |                     |                    |                  |  |
|---------------------------------|---------------------------|----|--------------------------|------------------|--------------------|-----------------|-----------------------|-------------------------------------|---------------------|--------------------|------------------|--|
| Human (human agency)            | Human cognitive functions | NE | Perceiving (19%)         | Reasoning (62%)  | Predicting (0%)    | Planning (0%)   | Decision-making (62%) | Explaining (10%)                    | Interacting (33%)   | Creating (5%)      | Empathizing (0%) |  |
|                                 | Interaction human to AI   | ME | Facilitating (5%)        |                  |                    | Verifying (10%) |                       |                                     | Supplementing (86%) |                    |                  |  |
|                                 | Human focus               | ME | Sensemaking (52%)        |                  | Creativity (19%)   |                 | Compassion (5%)       |                                     | Flexibility (24%)   |                    |                  |  |
| AI (material agency)            | AI cognitive functions    | NE | Perceiving (33%)         | Reasoning (100%) | Predicting (71%)   |                 | Planning (5%)         | Decision-making (5%)                |                     | Interacting (10%)  | Creating (10%)   |  |
|                                 | Interaction AI to human   | ME | Facilitating (71%)       |                  |                    | Verifying (0%)  |                       |                                     | Supplementing (29%) |                    |                  |  |
|                                 | AI focus                  | ME | Automation (0%)          |                  |                    |                 | Augmentation (100%)   |                                     |                     |                    |                  |  |
| Sociomaterial practices         | Form of interworking      | ME | Parallel (0%)            |                  | Sequential (100%)  |                 |                       |                                     | Flexible (0%)       |                    |                  |  |
|                                 | Mode of interworking      | ME | Singular (0%)            |                  |                    |                 | Continuous (100%)     |                                     |                     |                    |                  |  |
|                                 | Learning                  | ME | None (10%)               | AI learns (0%)   | Human learns (29%) |                 |                       | Human and AI learn separately (19%) |                     | Co-evolution (43%) |                  |  |

Figure A. 7: Sequential co-evolution (assembly line AI) archetype

### Archetype 5: Flexible Co-Evolution (Collaborator AI)

| Layer 1: Sociomaterial entities | Layer 2: Dimensions       |    | Layer 3: Characteristics |                 |                    |                |                       |                                     |                     |                    |                   |  |
|---------------------------------|---------------------------|----|--------------------------|-----------------|--------------------|----------------|-----------------------|-------------------------------------|---------------------|--------------------|-------------------|--|
| Human (human agency)            | Human cognitive functions | NE | Perceiving (20%)         | Reasoning (35%) | Predicting (0%)    | Planning (5%)  | Decision-making (25%) | Explaining (5%)                     | Interacting (70%)   | Creating (10%)     | Empathizing (15%) |  |
|                                 | Interaction human to AI   | ME | Facilitating (5%)        |                 |                    | Verifying (5%) |                       |                                     | Supplementing (90%) |                    |                   |  |
|                                 | Human focus               | ME | Sensemaking (15%)        |                 | Creativity (10%)   |                | Compassion (15%)      |                                     | Flexibility (60%)   |                    |                   |  |
| AI (material agency)            | AI cognitive functions    | NE | Perceiving (50%)         | Reasoning (80%) | Predicting (50%)   |                | Planning (15%)        | Decision-making (10%)               |                     | Interacting (30%)  | Creating (5%)     |  |
|                                 | Interaction AI to human   | ME | Facilitating (50%)       |                 |                    | Verifying (0%) |                       |                                     | Supplementing (50%) |                    |                   |  |
|                                 | AI focus                  | ME | Automation (0%)          |                 |                    |                | Augmentation (100%)   |                                     |                     |                    |                   |  |
| Sociomaterial practices         | Form of interworking      | ME | Parallel (15%)           |                 | Sequential (0%)    |                |                       |                                     | Flexible (85%)      |                    |                   |  |
|                                 | Mode of interworking      | ME | Singular (0%)            |                 |                    |                | Continuous (100%)     |                                     |                     |                    |                   |  |
|                                 | Learning                  | ME | None (5%)                | AI learns (0%)  | Human learns (35%) |                |                       | Human and AI learn separately (25%) |                     | Co-evolution (35%) |                   |  |

Figure A. 8: Flexible co-evolution (collaborator AI) archetype

## **Appendix 8: Archetype Evaluation**

To assess their reliability and validity, we evaluated our archetypes by performing an internal Q-Sort. Two co-authors who were not yet familiar with the results of agglomerative clustering achieved an overall hit ratio of 100% (Moore and Benbasat 1991). The archetype-specific hit ratios also were 100%, which indicates a perfectly correct classification of the random sample of 25 human-AI hybrids. Moreover, the co-authors achieved a Cohen's (1960) kappa coefficient of 100%. Both the results of the hit ratios and Cohen's (1960) kappa coefficient represent a perfect agreement (Landis and Koch 1977). As a result, we regard our archetypes of human-AI hybrids as valid and reliable.

## Appendix References

- Agrawal A, Gans J, Goldfarb A (2018) Prediction machines: The simple economics of artificial intelligence. Harvard Business Review Press, Boston, MA.
- Aldenderfer M, Blashfield R (1984) Cluster Analysis. SAGE Publications, Thousand Oaks, CA.
- Ansari F, Glawar R, Nemeth T (2019) PriMa: a prescriptive maintenance model for cyber-physical production systems. *International Journal of Computer Integrated Manufacturing* 32(4-5):482–503. doi:10.1080/0951192X.2019.1571236.
- Barad K (2007) Meeting the universe halfway: Quantum physics and the entanglement of matter and meaning. Duke University Press, Durham.
- Berger B, Adam M, Rühr A, Benlian A (2021) Watch Me Improve - Algorithm Aversion and Demonstrating the Ability to Learn. *Business & Information Systems Engineering* 63(1):55–68. doi:10.1007/s12599-020-00678-5.
- Calinski T, Harabasz J (1974) A dendrite method for cluster analysis. *Communications in Statistics - Theory and Methods* 3(1):1–27. doi:10.1080/03610927408827101.
- Cohen J (1960) A Coefficient of Agreement for Nominal Scales. *Educational and Psychological Measurement* 20(1):37–46. doi:10.1177/001316446002000104.
- Daugherty PR, Wilson HJ (2018) Human + machine: Reimagining work in the age of AI. Harvard Business Review Press, Boston, MA.
- Davenport TH (2018) The AI advantage: How to put the artificial intelligence revolution to work. The MIT Press, Cambridge, MA.
- Davenport TH, Guha A, Grewal D, Bressgott T (2020) How artificial intelligence will change the future of marketing. *Journal of the Academy of Marketing Science* 48(1):24–42. doi:10.1007/s11747-019-00696-0.
- Davenport TH, Kirby J (2015) Beyond Automation. *Harvard Business Review* 93(5):58–65.

- Davies DL, Bouldin DW (1979) A Cluster Separation Measure. *IEEE Transactions on Pattern Analysis and Machine Intelligence* PAMI-1(2):224–227. doi:10.1109/TPAMI.1979.4766909.
- Doltsinis S, Ferreira P, Lohse N (2018) A Symbiotic Human–Machine Learning Approach for Production Ramp-up. *IEEE Transactions on Human-Machine Systems* 48(3):229–240. doi:10.1109/THMS.2017.2717885.
- Fleiss J (1971) Measuring nominal scale agreement among many raters. *Psychological Bulletin* 76(5):378–382. doi:10.1037/h0031619.
- Green B, Chen Y (2019) Disparate Interactions. In: *Proceedings of the Conference on Fairness, Accountability, and Transparency*, Atlanta, GA, pp 90–99.
- Grønsund T, Aanestad M (2020) Augmenting the algorithm: Emerging human-in-the-loop work configurations. *The Journal of Strategic Information Systems* 29(2):101614. doi:10.1016/j.jsis.2020.101614.
- Heer J (2019) Agency plus automation: Designing artificial intelligence into interactive systems. *Proceedings of the National Academy of Sciences of the United States of America* 116(6):1844–1850. doi:10.1073/pnas.1807184115.
- Iansiti M, Lakhani KR (2020) *Competing in the age of AI: Strategy and leadership when algorithms and networks run the world*. Harvard Business Review Press, Boston, MA.
- Jussupow E, Spohrer K, Heinzl A, Gawlitza J (2021) Augmenting Medical Diagnosis Decisions? An Investigation into Physicians’ Decision-Making Process with Artificial Intelligence. *Information Systems Research* 32(3):713–735. doi:10.1287/isre.2020.0980.
- Kahn LH, Savas O, Morrison A, Shaffer KA, Zapata L (2020) Modelling Hybrid Human-Artificial Intelligence Cooperation: A Call Center Customer Service Case Study. In: *Proceedings of the IEEE International Conference on Big Data*. IEEE, Los Angeles, CA.

- Klumpp M (2018) Automation and artificial intelligence in business logistics systems: human reactions and collaboration requirements. *International Journal of Logistics Research and Applications* 21(3):224–242. doi:10.1080/13675567.2017.1384451.
- Kundisch D, Muntermann J, Oberländer AM, Rau D, Röglinger M, Schoormann T, Szopinski D (2022) An Update for Taxonomy Designers. *Business & Information Systems Engineering* 64(4):421–439. doi:10.1007/s12599-021-00723-x.
- Lai Z-H, Tao W, Leu MC, Yin Z (2020) Smart augmented reality instructional system for mechanical assembly towards worker-centered intelligent manufacturing. *Journal of Manufacturing Systems* 55:69–81. doi:10.1016/j.jmsy.2020.02.010.
- Landis JR, Koch GG (1977) The Measurement of Observer Agreement for Categorical Data. *Biometrics* 33(1):159. doi:10.2307/2529310.
- Leonardi PM (2013) Theoretical foundations for the study of sociomateriality. *Information and Organization* 23(2):59–76. doi:10.1016/j.infoandorg.2013.02.002.
- Liew C (2018) The future of radiology augmented with Artificial Intelligence: A strategy for success. *European journal of radiology* 102:152–156. doi:10.1016/j.ejrad.2018.03.019.
- McAfee A, Brynjolfsson E (2017) *Machine, platform, crowd: Harnessing our digital future*. W.W. Norton & Company, New York, NY, London.
- Mirbabaie M, Stieglitz S, Brünker F, Hofeditz L, Ross B, Frick NRJ (2021) Understanding Collaboration with Virtual Assistants – The Role of Social Identity and the Extended Self. *Business & Information Systems Engineering* 63(1):21–37. doi:10.1007/s12599-020-00672-x.
- Moore GC, Benbasat I (1991) Development of an Instrument to Measure the Perceptions of Adopting an Information Technology Innovation. *Information Systems Research* 2(3):192–222. doi:10.1287/isre.2.3.192.

- Nickerson RC, Varshney U, Muntermann J (2013) A method for taxonomy development and its application in information systems. *European Journal of Information Systems* 22(3):336–359. doi:10.1057/ejis.2012.26.
- Paschen J, Wilson M, Ferreira JJ (2020) Collaborative intelligence: How human and artificial intelligence create value along the B2B sales funnel. *Business Horizons* 63(3):403–414. doi:10.1016/j.bushor.2020.01.003.
- Rousseeuw PJ (1987) Silhouettes: A graphical aid to the interpretation and validation of cluster analysis. *Journal of Computational and Applied Mathematics* 20:53–65. doi:10.1016/0377-0427(87)90125-7.
- Sarker S, Chatterjee S, Xiao X, Elbanna A (2019) The Sociotechnical Axis of Cohesion for the IS Discipline: Its Historical Legacy and its Continued Relevance. *MIS Quarterly* 43(3):695–719. doi:10.25300/MISQ/2019/13747.
- Schmitt J, Bönig J, Borggräfe T, Beiting G, Deuse J (2020) Predictive model-based quality inspection using Machine Learning and Edge Cloud Computing. *Advanced Engineering Informatics* 45:101101. doi:10.1016/j.aei.2020.101101.
- Shin W, Han J, Rhee W (2021) AI-assistance for predictive maintenance of renewable energy systems. *Energy* 221:119775. doi:10.1016/j.energy.2021.119775.
- Sonnenberg C, vom Brocke J (2012) Evaluation Patterns for Design Science Research Artefacts. In: Helfert M, Donnellan B (eds) *Practical Aspects of Design Science. EDSS 2011. Communications in Computer and Information Science*. Springer, Berlin, Heidelberg, pp 71–83.
- Sowa K, Przegalinska A, Ciechanowski L (2021) Cobots in knowledge work. *Journal of Business Research* 125:135–142. doi:10.1016/j.jbusres.2020.11.038.
- Syam N, Sharma A (2018) Waiting for a sales renaissance in the fourth industrial revolution: Machine learning and artificial intelligence in sales research and practice. *Industrial Marketing Management* 69:135–146. doi:10.1016/j.indmarman.2017.12.019.

- Tibshirani R, Walther G, Hastie T (2001) Estimating the number of clusters in a data set via the gap statistic. *Journal of the Royal Statistical Society: Series B (Statistical Methodology)* 63(2):411–423. doi:10.1111/1467-9868.00293.
- Tsang YP, Choy KL, Wu CH, Ho G, Lam CH, Koo PS (2018) An Internet of Things (IoT)-based risk monitoring system for managing cold supply chain risks. *Industrial Management & Data Systems* 118(7):1432–1462. doi:10.1108/IMDS-09-2017-0384.
- van Dun C, Moder L, Kratsch W, Röglinger M (2023) ProcessGAN: Supporting the creation of business process improvement ideas through generative machine learning. *Decision Support Systems* 165:Article 113880. doi:10.1016/j.dss.2022.113880.
- Varshney U (2014) Mobile health: Four emerging themes of research. *Decision Support Systems* 66:20–35. doi:10.1016/j.dss.2014.06.001.
- vom Brocke J, Simons A, Riemer K, Niehaves B, Plattfaut R, Cleven A (2015) Standing on the Shoulders of Giants: Challenges and Recommendations of Literature Search in Information Systems Research. *Communications of the Association for Information Systems* 37:205–224. doi:10.17705/1CAIS.03709.
- Webster J, Watson RT (2002) Analyzing the Past to Prepare for the Future: Writing a Literature Review. *MIS Quarterly* 26(2):xiii–xxiii. <http://www.jstor.org/stable/4132319>.
- Yin YH, Da Xu L, Bi Z, Chen H, Zhou C (2013) A Novel Human–Machine Collaborative Interface for Aero-Engine Pipe Routing. *IEEE Transactions on Industrial Informatics* 9(4):2187–2199. doi:10.1109/TII.2013.2257805.
- Zhang D, Pee LG, Cui L (2021) Artificial intelligence in E-commerce fulfillment: A case study of resource orchestration at Alibaba’s Smart Warehouse. *International Journal of Information Management* 57:102304. doi:10.1016/j.ijinfomgt.2020.102304.
